# Supplementary material for: The identification of a N6-methyladenosin-modifed immune pattern to predict immunotherapy response and survival in urothelial carcinoma
Source: publisher site journal article supplement (doi:10.18632/aging.205782), 2024-05-01
Supplement: Supplementary file [file aging-v16i9-205782-supplementary-material-SD4.pdf]

## SUPPLEMENTARY TABLES

**Supplementary Table 3. The condition number of a matrix(K) of the PIGs in for data series.**

| Series   | Condition number of a matrix(K) | If K < 100 |
|----------|---------------------------------|------------|
| GSE32894 | 14.27                           | Yes        |
| GSE32548 | 13.59                           | Yes        |
| GSE13507 | 7.09                            | Yes        |
| GSE48075 | 9.74                            | Yes        |
| TCGA     | 27.16                           | Yes        |

If  $K < 100$ , the degree of **collinearity** is very small; If  $100 \leq k \leq 1000$ , there is a general degree of **collinearity**; If  $k > 1000$ , there is a serious **collinearity**.

**Supplementary Table 4. Baseline information of 30 patients with UC.**

| Characteristic      | Case number (percentage) |
|---------------------|--------------------------|
| Gender              |                          |
| Male                | 23 (76.7%)               |
| Female              | 7 (23.3%)                |
| Age                 |                          |
| <60                 | 8 (26.7%)                |
| ≥60                 | 22 (73.3%)               |
| Stage               |                          |
| NMIBC (Ta/T1/Tis)   | 18 (60.0%)               |
| MIBC (T2–T4)        | 12 (40.0%)               |
| Disease Free Months |                          |
| <20                 | 5 (16.7%)                |
| ≥20, <40            | 13 (43.3%)               |
| ≥40                 | 12 (40%)                 |

**Supplementary Table 5. Primers used for quantitative real time-PCR.**

|                 |                |                          |
|-----------------|----------------|--------------------------|
| <b>TNFRSF6B</b> | Forward primer | GTACGCGGAGTGGCAGAAA      |
|                 | Reverse primer | CAGAGGACGTTGCAGTAGC      |
| <b>CXCL2</b>    | Forward primer | TCATAGCCACACTCAAGAAT     |
|                 | Reverse primer | AGGAACAGCCACCAATAAG      |
| <b>PSMD2</b>    | Forward primer | TGCTCGTGGAACGACTAGG      |
|                 | Reverse primer | CAGTTTGCCATAGTGTGGACG    |
| <b>VEGFC</b>    | Forward primer | GAGGAGCAGTTACGGTCTGTG    |
|                 | Reverse primer | TCCTTTCCTTAGCTGACACTTGT  |
| <b>GRB2</b>     | Forward primer | CTGGGTGGTGAAGTTCAATTCT   |
|                 | Reverse primer | GTTCTATGTCCCGCAGGAATATC  |
| <b>CMTM1</b>    | Forward primer | AACCTGAGTCATCCGAGGCA     |
|                 | Reverse primer | CAGTCTCCGTTGTTTCAAGT     |
| <b>CBL</b>      | Forward primer | TAGGCGAAACCTAACCAAACCTG  |
|                 | Reverse primer | AGAGTCCACTTGGAAAGATTCCCT |
| <b>CYR61</b>    | Forward primer | ACCGCTCTGAAGGGGATCT      |

|              |                |                         |
|--------------|----------------|-------------------------|
|              | Reverse primer | ACTGATGTTTACAGTTGGGCTG  |
| <b>SDC1</b>  | Forward primer | ACGGCTATTCCCACGTCTC     |
|              | Reverse primer | TCTGGCAGGACTACAGCCTC    |
| <b>CTSE</b>  | Forward primer | CAGTCCAGCACATACAGCCA    |
|              | Reverse primer | GCTCCAATGATCCCGGACAA    |
| <b>ACTIN</b> | Forward primer | CACCATTGGCAATGAGCGGTTTC |
|              | Reverse primer | AGGTCTTTGCGGATGTCCACGT  |

**Supplementary Table 6. Information of 28 IRGs selected by RSH-VH.**

| Probe_ID     | Symbol     | ENSG_ID         | Beta  | HR<br>(95% CI for HR) | Wald.<br>test | p-value | Depth | rel.<br>freq | Importance | EBTREZ_<br>ID |
|--------------|------------|-----------------|-------|-----------------------|---------------|---------|-------|--------------|------------|---------------|
| ILMN_1670918 | INSR       | ENSG00000171105 | -1.6  | 0.21 (0.072-0.6)      | 8.3           | 0.0039  | 6.547 | 22           | 0.001      | 3643          |
| ILMN_1814022 | NR1H3      | ENSG00000025434 | -0.96 | 0.38 (0.23-0.64)      | 13            | 0.00028 | 6.003 | 23           | 0.00085    | 10062         |
| ILMN_2387224 | CTSE       | ENSG00000196188 | -0.93 | 0.4 (0.24-0.65)       | 13            | 0.00029 | 5.736 | 22           | 0.00289    | 1510          |
| ILMN_1815308 | SDC1       | ENSG00000115884 | -0.75 | 0.47 (0.31-0.71)      | 13            | 0.00026 | 6.395 | 22           | 0.00297    | 6382          |
| ILMN_1799887 | CTSE       | ENSG00000196188 | -0.63 | 0.53 (0.39-0.72)      | 17            | 3.4E-05 | 6.096 | 21           | 0.00625    | 1510          |
| ILMN_2364384 | PPARG      | ENSG00000132170 | -0.45 | 0.63 (0.5-0.8)        | 15            | 9.7E-05 | 6.941 | 22           | 0.00061    | 5468          |
| ILMN_2355486 | FAM3B      | ENSG00000183844 | -0.38 | 0.69 (0.59-0.81)      | 21            | 3.9E-06 | 6.875 | 26           | 0.00069    | 54097         |
| ILMN_1787897 | CXCL1      | ENSG00000163739 | 0.34  | 1.4 (1.1-1.8)         | 7.9           | 0.005   | 7.136 | 22           | -0.0001    | 2919          |
| ILMN_2374449 | SPP1       | ENSG00000118785 | 0.35  | 1.4 (1.2-1.7)         | 12            | 0.00058 | 6.746 | 27           | 0.00046    | 6696          |
| ILMN_1785699 | PTHLH      | ENSG00000087494 | 0.45  | 1.6 (1.2-2)           | 11            | 0.00073 | 6.673 | 21           | 0.0004     | 5744          |
| ILMN_1774685 | IL24       | ENSG00000162892 | 0.45  | 1.6 (1.3-2)           | 15            | 8.8E-05 | 6.82  | 20           | 0.00083    | 11009         |
| ILMN_1791726 | TUBB3      | ENSG00000258947 | 0.48  | 1.6 (1.3-2.1)         | 15            | 0.00013 | 6.618 | 21           | 0.00114    | 10381         |
| ILMN_1682636 | CXCL2      | ENSG00000081041 | 0.49  | 1.6 (1.3-2.1)         | 17            | 4.7E-05 | 6.421 | 22           | 0.00135    | 2920          |
| ILMN_2331231 | TNFRSF6B   | ENSG00000243509 | 0.56  | 1.8 (1.4-2.2)         | 24            | 1.2E-06 | 6.535 | 20           | 0.00125    | 8771          |
| ILMN_2188264 | CYR61/CNN1 | ENSG00000142871 | 0.64  | 1.9 (1.4-2.5)         | 20            | 6.6E-06 | 6.104 | 24           | 0.00295    | 3491          |
| ILMN_1696360 | CTSB       | ENSG00000164733 | 0.65  | 1.9 (1.2-3)           | 8             | 0.0046  | 6.873 | 21           | 0.00037    | 1508          |
| ILMN_1691884 | STC2       | ENSG00000113739 | 0.66  | 1.9 (1.5-2.6)         | 21            | 4.6E-06 | 6.024 | 25           | 0.00066    | 8614          |
| ILMN_1701204 | VEGFC      | ENSG00000150630 | 0.72  | 2 (1.3-3.1)           | 11            | 0.00077 | 5.99  | 21           | 0.00145    | 7424          |
| ILMN_2382906 | PLCG1      | ENSG00000124181 | 0.85  | 2.3 (1.4-4.1)         | 9.2           | 0.0024  | 6.095 | 21           | 0.00099    | 5335          |
| ILMN_1703178 | SCG2       | ENSG00000171951 | 0.91  | 2.5 (1.5-4)           | 14            | 0.00018 | 5.776 | 24           | -0.0003    | 7857          |
| ILMN_1758542 | BMP1       | ENSG00000168487 | 0.97  | 2.6 (1.7-4.1)         | 19            | 1.3E-05 | 6.722 | 22           | 0.0006     | 649           |
| ILMN_2181968 | CBL        | ENSG00000110395 | 1     | 2.8 (1.3-5.9)         | 7.4           | 0.0063  | 6.309 | 24           | 0.00242    | 867           |
| ILMN_1657968 | MAP2K2     | ENSG00000126934 | 1.1   | 2.9 (1.3-6.3)         | 6.8           | 0.0089  | 6.806 | 24           | 7.5E-05    | 5605          |
| ILMN_1725814 | IL24       | ENSG00000162892 | 1.2   | 3.4 (1.7-7)           | 12            | 0.00065 | 6.851 | 21           | 2.4E-05    | 11009         |
| ILMN_1748797 | GRB2       | ENSG00000177885 | 1.3   | 3.5 (1.6-7.6)         | 10            | 0.0016  | 6.539 | 22           | 0.00164    | 2885          |
| ILMN_2328363 | CMTM1      | ENSG00000089505 | 1.3   | 3.8 (1.7-8.6)         | 11            | 0.0011  | 5.758 | 21           | 0.0022     | 113540        |
| ILMN_2128128 | SHFM1      | ENSG00000127922 | 1.5   | 4.4 (1.4-14)          | 6.6           | 0.0099  | 6.167 | 21           | 0.00035    | NA            |
| ILMN_1712432 | PSMD2      | ENSG00000175166 | 1.9   | 6.6 (3.1-14)          | 23            | 1.5E-06 | 6.145 | 26           | 0.00135    | 5708          |
| ILMN_1681515 | CRLF1      | ENSG00000006016 | 2     | 7.6 (2.1-28)          | 9.4           | 0.0022  | 6.328 | 22           | 0.00116    | 9244          |
| ILMN_1707328 | KLRC2      | ENSG00000205809 | 5     | 150 (9.8-2300)        | 13            | 0.00032 | 6.556 | 21           | 3.3E-05    | 3822          |

**Supplementary Table 8. Differential analysis of m6A modification peaks.**

| Symbol | logFC       | P-value     | Annotation       | Gene ID            | Transcript.ID      | ENTREZ ID | GENENAME                                |
|--------|-------------|-------------|------------------|--------------------|--------------------|-----------|-----------------------------------------|
| INSR   | 1.439354567 | 0.000740458 | 3'UTR            | ENSG00000171105.14 | ENST000000601099.1 | 3643      | insulin receptor                        |
| NR1H3  | 2.557239473 | 0.001460625 | Promoter (≤1 kb) | ENSG00000025434.19 | ENST000000495866.5 | 10062     | nuclear receptor<br>subfamily 1 group H |

|        |             |             |                                                                      |                    |                    |        |                                                                  |
|--------|-------------|-------------|----------------------------------------------------------------------|--------------------|--------------------|--------|------------------------------------------------------------------|
|        |             |             |                                                                      |                    |                    |        | member 3                                                         |
| CTSE   | 3.062398039 | 0.000505438 | 3'UTR                                                                | ENSG00000196188.12 | ENST00000486757.1  | 1510   | cathepsin E                                                      |
| SDC1   | 1.793082706 | 0.008954021 | 3'UTR                                                                | ENSG00000115884.11 | ENST00000482879.5  | 6382   | syndecan 1                                                       |
| PPARG  | 1.559761642 | 0.030422269 | Promoter (2–3 kb)                                                    | ENSG00000132170.24 | ENST00000682446.1  | 5468   | peroxisome<br>proliferator activated<br>receptor gamma           |
| FAM3B  | 1.978350189 | 0.035157454 | Promoter (2–3 kb)                                                    | ENSG00000183844.17 | ENST00000398646.3  | 54097  | FAM3 metabolism<br>regulating signaling<br>molecule B            |
| SPP1   | 2.465630299 | 0.00949005  | Promoter (≤1 kb)                                                     | ENSG00000118785.15 | ENST00000505146.1  | 6696   | secreted<br>phosphoprotein 1                                     |
| CXCL2  | 2.773177463 | 0.003233683 | Promoter (≤1 kb)                                                     | ENSG00000081041.9  | ENST00000508487.3  | 2920   | C-X-C motif<br>chemokine ligand 2                                |
| CTSB   | 1.459450688 | 0.002211906 | 3'UTR                                                                | ENSG00000164733.23 | ENST00000530290.5  | 1508   | cathepsin B                                                      |
| PLCG1  | 2.46654589  | 4.95E-05    | 3'UTR                                                                | ENSG00000124181.15 | ENST00000244007.7  | 5335   | phospholipase C<br>gamma 1                                       |
| BMP1   | 1.781179922 | 0.016151302 | 3'UTR                                                                | ENSG00000168487.20 | ENST00000522332.1  | 649    | bone morphogenetic<br>protein 1                                  |
| CBL    | 1.788575387 | 0.029705874 | Promoter (≤1 kb)                                                     | ENSG00000110395.8  | ENST00000637974.1  | 867    | Cbl proto-oncogene                                               |
| MAP2K2 | 1.999922514 | 0.02765859  | Exon<br>(ENST00000262948.10/<br>ENSG00000126934.15,<br>exon 3 of 11) | ENSG00000126934.15 | ENST00000602167.5  | 5605   | mitogen-activated<br>protein kinase<br>2                         |
| GRB2   | 2.137806528 | 0.009303183 | Promoter (1–2 kb)                                                    | ENSG00000177885.15 | ENST00000581959.1  | 2885   | growth factor receptor<br>bound protein 2                        |
| CMTM1  | 2.946544842 | 0.001246492 | Promoter (≤1 kb)                                                     | ENSG00000089505.18 | ENST00000332695.11 | 113540 | CKLF like MARVEL<br>transmembrane<br>domain containing 1         |
| PSMD2  | 2.368671003 | 0.004369637 | Promoter (≤1 kb)                                                     | ENSG00000175166.17 | ENST00000445558.6  | 5708   | proteasome 26S<br>subunit ubiquitin<br>receptor, non-ATPase<br>2 |
| CRLF1  | 1.799564651 | 0.035473845 | Promoter (≤1 kb)                                                     | ENSG00000006016.12 | ENST00000594325.1  | 9244   | cytokine receptor like<br>factor 1                               |
