# Supplementary material for: The identification of a N6-methyladenosin-modifed immune pattern to predict immunotherapy response and survival in urothelial carcinoma
Source: Aging (Albany NY). 2024 May 1;16(9):7774–98. doi: 10.18632/aging.205782 (PMC11131986; doi:10.18632/aging.205782)
Supplement: Supplementary Table 1 [file aging-16-205782-s002.xlsx]

## Sheet: Sheet1
Supplementary Table 1. Summary of clinical characteristics for the included datasets.
	GSE13507		GSE32894		GSE32548		TCGA-BLCA		GSE48075		IMvigor210
Age(year)	66±11.9711405	Age(year)	70±11.2809605	Age(year)	69.7±10.6083556	Age(year)	68.499±10.566	Age(year)	68.76±10.2	SEX
SEX		SEX		SEX		SEX		Clinical T		female	35 (21%)
female	30(18,2%)	female	61(27.2%)	female	31(23.8%)	female	106(26.2%)	T2	42(57.5%)	male	133 (79%)
male	135(81.8%)	male	163(72.8%)	male	99(76.2%)	male	298(73.8%)	T3	23(31.5%)	Best Confirmed Overall Response
Tumor Stage		Tumor Stage		Tumor Stage		AJCC Pathologic T		T4	8(11%)	CR	15 (8.9%)
Ta	24(14.5%)	Ta	110(49.1%)	Ta	40(30.8%)	T0	1(0.3%)	Pathologic N		PD	91 (54%)
T1	11(6.7%)	T1	63(28.1%)	T1	51(39.2%)	T1	3(0.8%)	N+	11(11.5%)	PR	27 (16%)
T2	19(11.5%)	T2	43(19.2%)	≥T2	38(29.2%)	T2	118(31.7%)	N0	62(84.9%)	SD	35 (21%)
T3	31(18.8%)	T3	7(3.1%)	Tx	1(0.8%)	T3	194(52.2%)	Pathologic M		BinaryResponse
T4	80(48.5%)	T4	1(0.4%)	Tumor Grade		T4	55(14.8%)	M+	7(9.6%)	CR/PR	42(25%)
Lymph Node Metastasis		Pathologic N		G1	15(11.5%)	TX	1(0.3%)	M0	66(90.4%)	SD/PD	126(75%)
N0	149(90.3%)	N0	26(55.3%)	G2	40(30.8%)	AJCC Pathologic N		Overall Survival		Immune Phenotype
N1	8(4.8%)	N+	21(44.7%)	G3	75(57.7%)	N0	234(58.8%)	yes	45(61.6%)	desert	44(31%)
N2	6(3.6%)	Tumor Grade		Multifocality		N1	46(11.6%)	no	28(38.4%)	excluded	59(41%)
N3	1(0.6%)	G1	45(20.1%)	1	54(68.4%)	N2	74(18.6%)	Cancer Specific Survival		inflamed	40(28%)
NX	1(0.6%)	G2	84(37.5%)	2-7	22(27.8%)	N3	8(2%)	yes	38(52.1%)	unknown	25
Metastasis		G3	93(41.5%)	>7	3(3.8%)	NX	36(9%)	no	35(47.9%)	Tissue
M0	158(95.8%)	GX	2(0.9%)	Tumor Size> 3 cm		AJCC Pathologic M		Survival Month	36.895±34.706	bladder	168(100%)
M1	7(4.2$)	Progression		yes	23(35.4%)	M0	194(48.4%)
Tumor Grade		yes	211(94.2%)	no	42(64.6%)	M1	11(2.7%)
G1	105(63.6%)	no	13(5.8%)	Concomittant CIS		MX	196(48.9%)
G2	60(43.7%)	Cancer Specific Survival		yes	10(11.5%)	AJCC Clinical T
G3	-	Alive	199(88.8%)	no	77(88.5%)	T1	9(5.2%)
Recurrence		Dead	25(11.2%)	Progression to ≥T2		T2	119(68.4%)
yes	36(35%)	Survival Month	35.0794521±25.5794006	yes	8(8.8%)	T3	30(17.2%)
no	67(65%)			no	83(91.2%)	T4	11(6.3%)
Progression				Cancer Specific Survival		TX	5(2.9%)
yes	31(18.8%)			yes	25(19.2%)	Overall Survival
no	134(81.2%)			no	105(80.8%)	yes	180(44.6%)
Overall Survival				Survival Month	50.39±28.9505212	no	224(55.4%)
Alive	96(58.2%)					Survival Month	26.83±27.5
Dead	69(41.8%)
Cancer Specific Survival
Alive	133(80.6%)
Dead	32(19.4%)
Survival Month	48.3816162±37.704354
Systemic Chemo
yes	27(16.4%)
no	138(83.6%)
