# Supplementary material for: The identification of a N6-methyladenosin-modifed immune pattern to predict immunotherapy response and survival in urothelial carcinoma
Source: Aging (Albany NY). 2024 May 1;16(9):7774–98. doi: 10.18632/aging.205782 (PMC11131986; doi:10.18632/aging.205782)
Supplement: Supplementary Table 2 [file aging-16-205782-s003.xlsx]

## Sheet: Sheet1
Supplementary Table 2. Information of 166 IRGs selected by Univariate cox regression analysis (p < 0.01).
probe_ID	symbol	beta	HR (95% CI for HR)	wald.test	p.value
ILMN_1720243	IL25	-2.7	0.067 (0.011-0.41)	8.6	0.0033
ILMN_1804064	ESRRG	-2.3	0.098 (0.018-0.52)	7.5	0.0063
ILMN_2399100	FGF5	-2.3	0.1 (0.022-0.48)	8.4	0.0037
ILMN_1732318	PTK2B	-2.2	0.12 (0.025-0.54)	7.6	0.006
ILMN_1667840	CMTM3	-2	0.13 (0.029-0.61)	6.7	0.0094
ILMN_1666174	CECR1	-2	0.13 (0.029-0.6)	6.9	0.0086
ILMN_1651966	FGFR3	-1.9	0.15 (0.046-0.48)	10	0.0014
ILMN_1685767	FAM3B	-1.9	0.16 (0.064-0.38)	16	5e-05
ILMN_1744862	TGFBR2	-1.8	0.16 (0.057-0.47)	11	0.00081
ILMN_2273053	IL15	-1.7	0.18 (0.061-0.55)	9.1	0.0025
ILMN_1670918	INSR	-1.6	0.21 (0.072-0.6)	8.3	0.0039
ILMN_1806249	IL1RN	-1.6	0.2 (0.064-0.59)	8.3	0.004
ILMN_1769988	IFNA10	-1.6	0.19 (0.072-0.53)	10	0.0013
ILMN_1770938	PAK7	-1.6	0.2 (0.088-0.46)	15	0.00013
ILMN_1661804	CTF1	-1.5	0.21 (0.098-0.47)	15	0.00012
ILMN_2129202	IFNA14	-1.5	0.22 (0.11-0.45)	17	4.3e-05
ILMN_1699798	HRAS	-1.4	0.24 (0.083-0.71)	6.7	0.0099
ILMN_1755134	HSPA4	-1.4	0.25 (0.12-0.54)	13	0.00033
ILMN_1670912	ACVR2A	-1.3	0.28 (0.14-0.57)	12	0.00043
ILMN_1693738	CTSE	-1.2	0.31 (0.14-0.69)	8.2	0.0042
ILMN_2337931	CXCR5	-1.2	0.29 (0.13-0.67)	8.4	0.0037
ILMN_1779401	CHP	-1.2	0.31 (0.16-0.63)	11	0.001
ILMN_1689953	CD81	-1.1	0.32 (0.14-0.75)	6.9	0.0088
ILMN_2372413	BID	-1	0.35 (0.18-0.69)	9.5	0.002
ILMN_2146418	CRIM1	-1	0.36 (0.2-0.62)	13	0.00027
ILMN_2167416	MR1	-1	0.35 (0.21-0.59)	15	8.4e-05
ILMN_2354285	GNRH2	-0.97	0.38 (0.19-0.76)	7.5	0.0062
ILMN_1814022	NR1H3	-0.96	0.38 (0.23-0.64)	13	0.00028
ILMN_1713636	S100A6	-0.94	0.39 (0.22-0.69)	11	0.0011
ILMN_1682661	BMP3	-0.93	0.39 (0.23-0.68)	11	0.00077
ILMN_1721978	CARD11	-0.82	0.44 (0.3-0.66)	16	5.7e-05
ILMN_1695107	IL20RA	-0.8	0.45 (0.31-0.64)	19	1.5e-05
ILMN_1672080	NR2F6	-0.79	0.46 (0.27-0.78)	8.2	0.0042
ILMN_1784287	TGFBR3	-0.78	0.46 (0.35-0.61)	28	1e-07
ILMN_1815308	SDC1	-0.75	0.47 (0.31-0.71)	13	0.00026
ILMN_2199389	VIPR1	-0.73	0.48 (0.34-0.7)	15	9.3e-05
ILMN_1675939	IFNGR1	-0.72	0.48 (0.29-0.82)	7.2	0.0072
ILMN_1699695	TNFRSF21	-0.72	0.49 (0.31-0.75)	10	0.0012
ILMN_1786823	ICAM2	-0.71	0.49 (0.29-0.83)	7.1	0.0077
ILMN_1844408	PLXNA2	-0.71	0.49 (0.3-0.82)	7.5	0.0061
ILMN_1760103	GKN1	-0.63	0.53 (0.35-0.81)	8.8	0.0031
ILMN_1698934	CMTM7	-0.62	0.54 (0.34-0.85)	7	0.0079
ILMN_1741566	BMP7	-0.45	0.64 (0.5-0.82)	13	0.00037
ILMN_2364384	PPARG	-0.45	0.63 (0.5-0.8)	15	9.7e-05
ILMN_1815719	PLCG2	-0.44	0.64 (0.46-0.89)	7	0.0083
ILMN_1657679	VAV3	-0.41	0.66 (0.52-0.84)	12	0.00059
ILMN_1666733	IL8	0.23	1.3 (1.1-1.5)	8.4	0.0037
ILMN_2161577	CXCL6	0.26	1.3 (1.1-1.6)	7.5	0.006
ILMN_2171384	CXCL5	0.29	1.3 (1.1-1.6)	10	0.0012
ILMN_2105573	CCL3L3	0.3	1.4 (1.1-1.6)	9.5	0.002
ILMN_1671509	CCL3	0.32	1.4 (1.1-1.7)	8.6	0.0033
ILMN_2100209	CCL4L1	0.33	1.4 (1.1-1.7)	8.7	0.0032
ILMN_1752592	HLA-DRB4	0.34	1.4 (1.1-1.8)	7.4	0.0065
ILMN_1787897	CXCL1	0.34	1.4 (1.1-1.8)	7.9	0.005
ILMN_2371280	CSF3R	0.35	1.4 (1.1-1.8)	8.6	0.0033
ILMN_2374449	SPP1	0.35	1.4 (1.2-1.7)	12	0.00058
ILMN_1752965	GREM1	0.35	1.4 (1.2-1.7)	12	0.00042
ILMN_1772964	CCL8	0.36	1.4 (1.2-1.8)	12	0.00067
ILMN_1783593	CCL13	0.37	1.4 (1.1-1.9)	7	0.0081
ILMN_1784884	LILRB3	0.37	1.5 (1.1-1.8)	9.7	0.0019
ILMN_1659075	HLA-DOA	0.38	1.5 (1.1-1.9)	7.4	0.0066
ILMN_2123743	FCER1G	0.38	1.5 (1.1-1.9)	8.1	0.0044
ILMN_1704154	TNFRSF19	0.38	1.5 (1.2-1.8)	12	0.00041
ILMN_1720048	CCL2	0.38	1.5 (1.2-1.8)	12	0.00061
ILMN_1718182	THRA	0.38	1.5 (1.2-1.8)	14	0.00017
ILMN_2314169	PTHLH	0.39	1.5 (1.2-1.8)	16	7.4e-05
ILMN_1661266	HLA-DQB1	0.41	1.5 (1.2-2)	9	0.0026
ILMN_1778977	TYROBP	0.42	1.5 (1.2-2)	10	0.0015
ILMN_1788107	IL11	0.43	1.5 (1.1-2.1)	7.1	0.0075
ILMN_1719759	TNC	0.43	1.5 (1.3-1.9)	18	2.2e-05
ILMN_1801246	IFITM1	0.44	1.5 (1.2-2.1)	8.8	0.0029
ILMN_2092118	FPR1	0.45	1.6 (1.2-2)	11	0.0008
ILMN_1676663	TNFRSF11B	0.45	1.6 (1.2-2)	15	0.0001
ILMN_1774685	IL24	0.45	1.6 (1.3-2)	15	8.8e-05
ILMN_1686623	CSF1R	0.46	1.6 (1.2-2.2)	8.4	0.0038
ILMN_1656057	PLAU	0.47	1.6 (1.2-2.2)	9.7	0.0019
ILMN_1791726	TUBB3	0.48	1.6 (1.3-2.1)	15	0.00013
ILMN_1731561	ROBO3	0.49	1.6 (1.1-2.4)	7	0.0082
ILMN_1787186	NOV	0.49	1.6 (1.2-2.3)	7.9	0.0048
ILMN_1689836	C5AR1	0.49	1.6 (1.2-2.3)	9.3	0.0023
ILMN_1682636	CXCL2	0.49	1.6 (1.3-2.1)	17	4.7e-05
ILMN_1725519	CCL11	0.5	1.6 (1.2-2.3)	8.2	0.0041
ILMN_1687652	TGFB3	0.5	1.6 (1.2-2.2)	12	0.00063
ILMN_1677723	ANGPT1	0.51	1.7 (1.1-2.4)	6.9	0.0087
ILMN_1676372	CD209	0.51	1.7 (1.2-2.3)	8.3	0.0041
ILMN_1688580	CAMP	0.51	1.7 (1.2-2.3)	10	0.0013
ILMN_2408543	PLAUR	0.51	1.7 (1.3-2.1)	17	3.5e-05
ILMN_2341595	KITLG	0.52	1.7 (1.1-2.5)	6.8	0.0093
ILMN_1686555	FYN	0.52	1.7 (1.2-2.4)	7.7	0.0057
ILMN_1786197	NR2F1	0.52	1.7 (1.3-2.2)	13	0.00036
ILMN_2352077	KL	0.53	1.7 (1.2-2.5)	7.6	0.0058
ILMN_1680339	PDGFRL	0.53	1.7 (1.2-2.4)	10	0.0015
ILMN_1807277	IFI30	0.55	1.7 (1.3-2.3)	14	0.00016
ILMN_1683023	PDGFC	0.56	1.7 (1.2-2.5)	9.2	0.0024
ILMN_2115125	CTGF	0.56	1.7 (1.3-2.3)	14	0.00018
ILMN_2331231	TNFRSF6B	0.56	1.8 (1.4-2.2)	24	1.2e-06
ILMN_2089875	TNFSF4	0.58	1.8 (1.2-2.6)	9.8	0.0017
ILMN_1781700	IL18R1	0.59	1.8 (1.2-2.7)	9.1	0.0025
ILMN_1804901	IL1F5	0.61	1.8 (1.2-2.9)	6.8	0.0091
ILMN_1661197	CLCF1	0.61	1.8 (1.3-2.6)	13	0.00036
ILMN_1760778	ENG	0.62	1.9 (1.2-2.9)	7.6	0.006
ILMN_1807050	SHC4	0.62	1.9 (1.2-2.8)	9.2	0.0024
ILMN_1815057	PDGFRB	0.62	1.9 (1.4-2.5)	18	2.8e-05
ILMN_2188264	CYR61	0.64	1.9 (1.4-2.5)	20	6.6e-06
ILMN_1775822	PDGFB	0.65	1.9 (1.2-3.1)	7	0.0081
ILMN_1696360	CTSB	0.65	1.9 (1.2-3)	8	0.0046
ILMN_1652413	UCN2	0.65	1.9 (1.3-2.9)	10	0.0016
ILMN_1807359	CLEC11A	0.65	1.9 (1.4-2.6)	17	3e-05
ILMN_2322498	RORA	0.66	1.9 (1.3-2.9)	9.5	0.002
ILMN_1691884	STC2	0.66	1.9 (1.5-2.6)	21	4.6e-06
ILMN_1676449	SLIT2	0.69	2 (1.4-2.9)	14	0.00019
ILMN_1796629	EDNRA	0.7	2 (1.4-2.9)	14	0.00019
ILMN_1747251	LTB4R	0.71	2 (1.4-3)	13	0.00037
ILMN_1701204	VEGFC	0.72	2 (1.3-3.1)	11	0.00077
ILMN_1699574	NRP1	0.73	2.1 (1.4-3)	14	0.00016
ILMN_1730628	RNASE2	0.74	2.1 (1.5-2.9)	18	2.2e-05
ILMN_2059549	SYK	0.75	2.1 (1.3-3.5)	8.5	0.0035
ILMN_1719972	PLXNA3	0.75	2.1 (1.4-3.3)	11	0.00076
ILMN_1660995	AMH	0.77	2.2 (1.5-3.1)	18	1.7e-05
ILMN_2349633	TNFRSF18	0.78	2.2 (1.2-3.9)	7.2	0.0075
ILMN_1738725	LIF	0.79	2.2 (1.4-3.4)	12	0.0005
ILMN_2413323	GRP	0.82	2.3 (1.5-3.5)	13	0.00027
ILMN_2205999	OSMR	0.84	2.3 (1.5-3.5)	17	4.3e-05
ILMN_2069745	SSTR1	0.85	2.3 (1.2-4.4)	6.9	0.0088
ILMN_2382906	PLCG1	0.85	2.3 (1.4-4.1)	9.2	0.0024
ILMN_1728071	KRAS	0.86	2.4 (1.4-4.1)	9.3	0.0022
ILMN_1703178	SCG2	0.91	2.5 (1.5-4)	14	0.00018
ILMN_1758542	BMP1	0.97	2.6 (1.7-4.1)	19	1.3e-05
ILMN_2181968	CBL	1	2.8 (1.3-5.9)	7.4	0.0063
ILMN_1652735	RFXAP	1	2.8 (1.4-5.8)	7.8	0.0051
ILMN_1657968	MAP2K2	1.1	2.9 (1.3-6.3)	6.8	0.0089
ILMN_1780987	RFXANK	1.1	2.9 (1.3-6.5)	7	0.0081
ILMN_1702837	PSMD1	1.1	2.9 (1.4-6.2)	7.6	0.006
ILMN_1805007	SEMA4F	1.1	3.1 (1.5-6.4)	8.8	0.003
ILMN_2206126	RAET1L	1.1	2.9 (1.5-5.6)	10	0.0015
ILMN_1765621	HDGF	1.1	3 (1.5-6)	10	0.0016
ILMN_2224833	ADIPOR2	1.2	3.3 (1.5-7.1)	9.4	0.0022
ILMN_1760143	ADRM1	1.2	3.3 (1.6-6.8)	10	0.0014
ILMN_1805395	LTBP3	1.2	3.4 (1.7-6.7)	12	0.00047
ILMN_1703075	PYY	1.3	3.8 (1.5-9.4)	7.9	0.0049
ILMN_1737396	PSMD14	1.3	3.8 (1.7-8.8)	10	0.0014
ILMN_1748797	GRB2	1.3	3.5 (1.6-7.6)	10	0.0016
ILMN_1809010	PSMC3	1.3	3.6 (1.7-7.7)	10	0.0012
ILMN_2328363	CMTM1	1.3	3.8 (1.7-8.6)	11	0.0011
ILMN_1794370	SEMA5B	1.3	3.6 (1.8-7.5)	12	0.00052
ILMN_2325610	AKT3	1.4	4.2 (1.7-11)	9.2	0.0024
ILMN_2128128	SHFM1	1.5	4.4 (1.4-14)	6.6	0.0099
ILMN_1808132	FAS	1.5	4.7 (1.5-15)	7	0.0079
ILMN_1736353	PSMC1	1.6	5.1 (2.2-12)	14	0.00015
ILMN_1701967	SHC1	1.7	5.7 (1.6-21)	7	0.0084
ILMN_1659601	CCL26	1.7	5.7 (2.6-13)	18	2.1e-05
ILMN_1689001	CDK4	1.8	6.2 (3.7-10)	49	2.1e-12
ILMN_1768784	PSMC2	1.9	6.5 (2.3-18)	12	0.00043
ILMN_1712432	PSMD2	1.9	6.6 (3.1-14)	23	1.5e-06
ILMN_1681515	CRLF1	2	7.6 (2.1-28)	9.4	0.0022
ILMN_2376484	NRP2	2.1	7.9 (2.4-26)	12	0.00059
ILMN_1733402	CSF1	2.2	8.6 (2-38)	8.2	0.0042
ILMN_1675192	IFNA21	2.3	10 (2-50)	7.9	0.0049
ILMN_1796229	FGFR1	2.3	10 (3-35)	14	0.00021
ILMN_1697444	IL1RL1	2.4	11 (2.2-54)	8.5	0.0035
ILMN_2112580	FCGR3A	2.5	12 (2.7-51)	11	0.0011
ILMN_1694311	NUDT6	2.8	16 (2.5-100)	8.6	0.0034
ILMN_1755535	EGFR	3.1	22 (2.1-240)	6.6	0.0099
ILMN_1694817	TRH	3.4	31 (4.5-220)	12	0.00049
ILMN_1698186	IFNA2	4.3	75 (2.9-1900)	6.8	0.009
ILMN_1707328	KLRC2	5	150 (9.8-2300)	13	0.00032
