# Supplementary material for: The identification of a N6-methyladenosin-modifed immune pattern to predict immunotherapy response and survival in urothelial carcinoma
Source: Aging (Albany NY). 2024 May 1;16(9):7774–98. doi: 10.18632/aging.205782 (PMC11131986; doi:10.18632/aging.205782)
Supplement: Supplementary Table 7 [file aging-16-205782-s005.xlsx]

## Sheet: Sheet1
Supplementary Table 7. The PIGs identified by RSF-VH are modified by WERs and exhibit altered expression levels in the perturbation experiment combined with MeRIP-seq.
rm2target_id	analysis_id	wer	target_gene	organism	cell_line	pmid	gse_id	peak	strand	log2fc	p_value	padj	region	gene_type	direction	perturbation	control_value	perturbation_value	con_avg_value	per_avg_value	method	rmbase_id	matk_predict_sites	rmvar_id
RM2Target_311752	Ana_mod_hsa_3	METTL3	INSR	Homo sapiens	HeLa	29507755	GSE102493	chr19:7117031-7117468	-	1.773	9.9232e-05	0.0014729	CDS	coding	up-regulated	Mutant	2.8734,4.0879,2.6115,3.5585	4.8419,5.1255	3.2828	4.9837	MeRIP-seq	m6A_site_223519,m6A_site_223520,m6A_site_223521,m6A_site_223522	chr19:7117133(-),chr19:7117215(-),chr19:7117236(-),chr19:7117278(-)	RMVar_ID_422389,RMVar_ID_422381,RMVar_ID_422379,RMVar_ID_422385,RMVar_ID_422392,RMVar_ID_422383,RMVar_ID_764819,RMVar_ID_422386,RMVar_ID_422388,RMVar_ID_422377,RMVar_ID_765047,RMVar_ID_422384,RMVar_ID_422391,RMVar_ID_422380,RMVar_ID_422376,RMVar_ID_422387,RMVar_ID_422390,RMVar_ID_764002,RMVar_ID_422378,RMVar_ID_766533,RMVar_ID_768136,RMVar_ID_422382
RM2Target_512831	Ana_mod_hsa_6	VIRMA	NR1H3	Homo sapiens	HeLa	29507755	GSE102493	chr11:47259627-47259979	+	9.4995	7.6141e-07	2.1886e-06	CDS	coding	up-regulated	KD	0.0938,0.1392	1.0577,4.2559	0.1165	2.6568	MeRIP-seq	m6A_site_72297,m6A_site_72295,m6A_site_72296	chr11:47259790(+)	RMVar_ID_912506
RM2Target_356467	Ana_mod_hsa_3	METTL3	SDC1	Homo sapiens	HeLa	29507755	GSE102493	chr2:20224911-20225543	-	3.4872	0.0027346	0.019553	intron	coding	up-regulated	Mutant	0.9813,1.4884,1.3088,2.2412	8.9202,5.6212	1.5049	7.2707	MeRIP-seq	m6A_site_255478,m6A_site_255479,m6A_site_255481,m6A_site_255477,m6A_site_255480,m6A_site_255476	chr2:20224934(-),chr2:20224980(-),chr2:20225001(-),chr2:20225015(-),chr2:20225254(-),chr2:20225313(-),chr2:20225329(-)	RMVar_ID_501098,RMVar_ID_501097,RMVar_ID_501100,RMVar_ID_501096,RMVar_ID_501102,RMVar_ID_501099,RMVar_ID_501101,RMVar_ID_1242049,RMVar_ID_1242048
RM2Target_215485	Ana_mod_hsa_26	METTL14	PPARG	Homo sapiens	skin	34452996	GSE145924	chr3:12416805-12417093	+	-1.497	0.03669	0.2945	CDS	coding	down-regulated	KD	2.6924,2.9446	1.5327,0.4366	2.8185	0.9847	MeRIP-seq		chr3:12417012(+),chr3:12417052(+)	RMVar_ID_167970,RMVar_ID_167969,RMVar_ID_167971,RMVar_ID_167967,RMVar_ID_167968
RM2Target_591604	Ana_mod_hsa_44	WTAP	PTHLH	Homo sapiens	A549	24981863	GSE55572	chr12:27969941-27970279	-	2.2954	0.0051401	0.058723	5UTR coding up-regulated KD "1.718,1.9085,1.9428,0.784" "3.1651,5.7003,3.6561" 1.5883 4.1738 MeRIP-seq "m6A_site_94850,m6A_site_94849,m6A_site_94851" RM2Target_578475 Ana_mod_hsa_44 WTAP IPO8 Homo sapiens A549 24981863 GSE55572 chr12:30695538-30695869 - 1.867 0.0027079 0.04294 5UTR	coding	up-regulated	KD	1.1921,1.1045,2.1315,0.5242	1.6147,3.6874,2.959	1.2381	2.7537	MeRIP-seq	m6A_site_94975,m6A_site_94974,m6A_site_94973		RMVar_ID_635008,RMVar_ID_946842,RMVar_ID_852795,RMVar_ID_635007,RMVar_ID_635005,RMVar_ID_635006
RM2Target_520159	Ana_mod_hsa_6	VIRMA	TUBB3	Homo sapiens	HeLa	29507755	GSE102493	chr16:89921581-89922245	+	4.9456	9.2621e-09	3.7727e-08	5UTR coding up-regulated KD "0.4319,0.4161" "1.719,1.7981" 0.424 1.7586 MeRIP-seq "m6A_site_179289,m6A_site_179291,m6A_site_179280,m6A_site_179282,m6A_site_179285,m6A_site_179286,m6A_site_179290,m6A_site_179283,m6A_site_179287,m6A_site_179281,m6A_site_179284,m6A_site_179288" "chr16:89921726(+),chr16:89921853(+),chr16:89921929(+),chr16:89921975(+),chr16:89921993(+),chr16:89922010(+),chr16:89922023…	coding	up-regulated	KD	0.0318,0.0372	1.9513,19.01	0.0345	10.4807	MeRIP-seq	m6A_site_179325,m6A_site_179326	chr16:89954326(+)	RMVar_ID_1046777,RMVar_ID_786427,RMVar_ID_788331,RMVar_ID_786157,RMVar_ID_1046779,RMVar_ID_1046780,RMVar_ID_409926,RMVar_ID_1507239,RMVar_ID_1046778
RM2Target_372325	Ana_mod_hsa_21	METTL3	TNFRSF6B	Homo sapiens	HEC-1A	31949099	GSE140557	chr20:63698034-63698589	+	-0.7576	0.045527	0.2095	CDS	coding	down-regulated	KD	1.7318,1.3524	0.7872,1.1989	1.5421	0.993	MeRIP-seq			RMVar_ID_444967,RMVar_ID_444968,RMVar_ID_444970,RMVar_ID_444969
RM2Target_562505	Ana_mod_hsa_44	WTAP	CCN1	Homo sapiens	A549	24981863	GSE55572	chr1:85582789-85583407	+	-0.9312	0.013679	0.098476	3UTR coding down-regulated KD "3.6209,3.6391,3.2336,3.8647" "0.9208,1.2313,1.458" 3.5896 1.2034 MeRIP-seq "m6A_site_19577,m6A_site_19579,m6A_site_19578,m6A_site_19582,m6A_site_19581,m6A_site_19576,m6A_site_19580" "chr1:85582883(+),chr1:85583019(+),chr1:85583037(+),chr1:85583072(+),chr1:85583142(+),chr1:85583198(+),chr1:85583224(+),chr1:85583313(+)" "RMVar_ID_260910,RMVar_ID_260915,RMVar_ID_260904…	coding	down-regulated	KD	1.952,3.936,3.26,1.047	0.4094,0.6201,0.4422	2.5488	0.4906	MeRIP-seq	m6A_site_19750,m6A_site_19751,m6A_site_19752,m6A_site_19753,m6A_site_19754,m6A_site_19755	chr1:86743243(+)	RMVar_ID_261034,RMVar_ID_261037,RMVar_ID_1196435,RMVar_ID_1196436,RMVar_ID_1196433,RMVar_ID_261036,RMVar_ID_1196434,RMVar_ID_757760,RMVar_ID_261039,RMVar_ID_1196432,RMVar_ID_261038,RMVar_ID_750207,RMVar_ID_261035
RM2Target_274717	Ana_mod_hsa_3	METTL3	CTSB	Homo sapiens	HeLa	29507755	GSE102493	chr8:11844871-11845370	-	-1.3044	1.4469e-06	4.6246e-05	3UTR coding down-regulated Mutant "1.4836,1.4283,1.3171,1.5517" "0.245,0.3079" 1.4452 0.2764 MeRIP-seq "m6A_site_430638,m6A_site_430639,m6A_site_430643,m6A_site_430641,m6A_site_430637,m6A_site_430640,m6A_site_430642,m6A_site_430636" "chr8:11844888(-),chr8:11844939(-),chr8:11844980(-),chr8:11844997(-),chr8:11845004(-),chr8:11845018(-),chr8:11845032(-)" "RMVar_ID_655541,RMVar_ID_655530,RMVar_ID_655…	coding	down-regulated	Mutant	1.2268,0.6997,1.3688,0.684	0.3237,0.2672	0.9948	0.2954	MeRIP-seq	m6A_site_441274,m6A_site_441277,m6A_site_441279,m6A_site_441278,m6A_site_441275,m6A_site_441280,m6A_site_441272,m6A_site_441270,m6A_site_441273,m6A_site_441276,m6A_site_441271	chr8:119731714(-),chr8:119731874(-),chr8:119731907(-),chr8:119731915(-),chr8:119731927(-),chr8:119731993(-),chr8:119732008(-),chr8:119732037(-),chr8:119732089(-),chr8:119732097(-)	RMVar_ID_742604,RMVar_ID_742614,RMVar_ID_847071,RMVar_ID_742602,RMVar_ID_742608,RMVar_ID_1540672,RMVar_ID_742613,RMVar_ID_742609,RMVar_ID_742612,RMVar_ID_742605,RMVar_ID_742600,RMVar_ID_742599,RMVar_ID_843239,RMVar_ID_742611,RMVar_ID_742606,RMVar_ID_742601,RMVar_ID_742607,RMVar_ID_742603,RMVar_ID_742610,RMVar_ID_843777
RM2Target_518434	Ana_mod_hsa_6	VIRMA	STC2	Homo sapiens	HeLa	29507755	GSE102493	chr5:173322968-173323585	-	3.4171	1.3108e-06	3.6247e-06	CDS	coding	up-regulated	KD	0.2398,0.2205	0.7341,1.4586	0.2302	1.0963	MeRIP-seq	m6A_site_379524,m6A_site_379523	chr5:173323073(-),chr5:173323233(-),chr5:173323269(-)	RMVar_ID_226942,RMVar_ID_820038
RM2Target_520656	Ana_mod_hsa_6	VIRMA	VEGFC	Homo sapiens	HeLa	29507755	GSE102493	chr4:176683650-176683959	-	-3.5022	0.010896	0.015686	3UTR coding down-regulated KD "3.4507,3.5414" "1.3915,0.7711" 3.496 1.0813 MeRIP-seq "m6A_site_358756,m6A_site_358757,m6A_site_358751,m6A_site_358752,m6A_site_358754,m6A_site_358755,m6A_site_358750,m6A_site_358759,m6A_site_358753,m6A_site_358758" "chr4:176683736(-),chr4:176683770(-)" "RMVar_ID_176497,RMVar_ID_1323016,RMVar_ID_1323018,RMVar_ID_176492,RMVar_ID_1323021,RMVar_ID_1529008,RMVar_ID_1764…	coding	down-regulated	KD	2.7556,3.8724	0.3994,0.2251	3.314	0.3122	MeRIP-seq	m6A_site_358794,m6A_site_358789,m6A_site_358796,m6A_site_358792,m6A_site_358793,m6A_site_358788,m6A_site_358787,m6A_site_358790,m6A_site_358795,m6A_site_358791	chr4:177353414(+),chr4:177353426(+),chr4:177353444(+),chr4:177353483(+),chr4:177353493(+),chr4:177353520(+),chr4:177353573(+)	RMVar_ID_759939,RMVar_ID_761157,RMVar_ID_176533,RMVar_ID_176539,RMVar_ID_176535,RMVar_ID_176532,RMVar_ID_176523,RMVar_ID_176540,RMVar_ID_176537,RMVar_ID_759940,RMVar_ID_176538,RMVar_ID_176520,RMVar_ID_176524,RMVar_ID_176529,RMVar_ID_176531,RMVar_ID_762155,RMVar_ID_176528,RMVar_ID_176530,RMVar_ID_176522,RMVar_ID_176526,RMVar_ID_176525,RMVar_ID_176536,RMVar_ID_176534,RMVar_ID_176527,RMVar_ID_176521
RM2Target_341499	Ana_mod_hsa_3	METTL3	PLCG1	Homo sapiens	HeLa	29507755	GSE102493	chr20:41162322-41162721	+	1.4313	0.0037243	0.024596	CDS	coding	up-regulated	Mutant	0.5713,0.5084,0.3916,0.7085	0.7077,0.5286	0.545	0.6181	MeRIP-seq			RMVar_ID_1207717
RM2Target_356142	Ana_mod_hsa_3	METTL3	SCG2	Homo sapiens	HeLa	29507755	GSE102493	chr2:223598273-223598670	-	-5.0614	0.00054071	0.0056371	CDS	coding	down-regulated	Mutant	1.2322,1.0658,1.5415,0.9611	0.5645,0.5782	1.2002	0.5714	MeRIP-seq	m6A_site_281022,m6A_site_281013,m6A_site_281020,m6A_site_281015,m6A_site_281019,m6A_site_281018,m6A_site_281016,m6A_site_281017,m6A_site_281021,m6A_site_281014		RMVar_ID_457517,RMVar_ID_457518,RMVar_ID_1256168,RMVar_ID_457514,RMVar_ID_457522,RMVar_ID_815720,RMVar_ID_1256171,RMVar_ID_818398,RMVar_ID_457511,RMVar_ID_457515,RMVar_ID_457516,RMVar_ID_457513,RMVar_ID_457512,RMVar_ID_814924,RMVar_ID_817678,RMVar_ID_1256169,RMVar_ID_457510,RMVar_ID_1256170,RMVar_ID_457521,RMVar_ID_457520,RMVar_ID_457519,RMVar_ID_457509
RM2Target_610674	Ana_mod_hsa_2	ZCCHC4	BMP1	Homo sapiens	HepG2	30531910	GSE102336	chr8:22209747-22210426	+	1.6802	0.00025052	0.044111	intron	coding	up-regulated	KO	1.9023,1.6065	3.5031,4.7228	1.7544	4.1129	MeRIP-seq			RMVar_ID_614011,RMVar_ID_614008,RMVar_ID_614009,RMVar_ID_614010
RM2Target_501837	Ana_mod_hsa_7	VIRMA	CBL	Homo sapiens	HeLa	29507755	GSE102493	chr11:119206273-119206594	+	3.9649	0.00034302	0.0013669	CDS	coding	up-regulated	KO	0.1536,0.1033	0.4406,1.3955,0.8983,0.4114	0.1285	0.7864	MeRIP-seq		chr11:119206571(+)
RM2Target_510976	Ana_mod_hsa_6	VIRMA	MAP2K2	Homo sapiens	HeLa	29507755	GSE102493	chr19:4099209-4099592	-	11.1266	8.1928e-09	3.373e-08	intron	coding	up-regulated	KD	0.0084,0.0077	1.2605,19.0649	0.00805	10.1627	MeRIP-seq	m6A_site_221308	chr19:4099373(-)
RM2Target_305458	Ana_mod_hsa_3	METTL3	GRB2	Homo sapiens	HeLa	29507755	GSE102493	chr17:75319465-75320111	-	2.2223	0.00013044	0.0018366	3UTR coding up-regulated Mutant "0.6578,0.3543,0.8226,0.3296" "0.8928,1.0238" 0.5411 0.9583 MeRIP-seq "m6A_site_204136,m6A_site_204132,m6A_site_204134,m6A_site_204133,m6A_site_204135" "chr17:75319857(-),chr17:75319962(-)" "RMVar_ID_1078747,RMVar_ID_1078746,RMVar_ID_1078745" RM2Target_305458 Ana_mod_hsa_3 METTL3 GRB2 Homo sapiens HeLa 29507755 GSE102493 chr17:75393604-75393939 - 1.5059 0.00054925 …	coding	up-regulated	Mutant	0.8489,0.7654,0.6424,0.7849	1.0036,0.9805	0.7604	0.9921	MeRIP-seq	m6A_site_204151,m6A_site_204152		RMVar_ID_1078776,RMVar_ID_628098,RMVar_ID_628096,RMVar_ID_628095,RMVar_ID_1078775,RMVar_ID_1078777,RMVar_ID_628099,RMVar_ID_628097,RMVar_ID_781159,RMVar_ID_1508975,RMVar_ID_628100
RM2Target_176125	Ana_mod_hsa_17	METTL14	CMTM1	Homo sapiens	EndoC-尾H1	31867565	GSE132306	chr16:66566405-66567076	+	-1.8124	0.0004715	0.053833	CDS	coding	down-regulated	KD	10.9987,9.0197,14.2442	3.3544,3.9327,6.992	11.4209	4.7597	MeRIP-seq	m6A_site_171358,m6A_site_171365,m6A_site_171360,m6A_site_171361,m6A_site_171359,m6A_site_171364,m6A_site_171363,m6A_site_171367,m6A_site_171362,m6A_site_171366		RMVar_ID_546781,RMVar_ID_546782,RMVar_ID_546800,RMVar_ID_546775,RMVar_ID_546786,RMVar_ID_546790,RMVar_ID_546780,RMVar_ID_546777,RMVar_ID_546784,RMVar_ID_546801,RMVar_ID_546789,RMVar_ID_546794,RMVar_ID_546773,RMVar_ID_546778,RMVar_ID_546783,RMVar_ID_1506249,RMVar_ID_546787,RMVar_ID_546791,RMVar_ID_546793,RMVar_ID_546788,RMVar_ID_786343,RMVar_ID_1506197,RMVar_ID_546799,RMVar_ID_546779,RMVar_ID_5467…
RM2Target_345618	Ana_mod_hsa_3	METTL3	PSMD2	Homo sapiens	HeLa	29507755	GSE102493	chr3:184299144-184299487	+	5.2409	1.784e-13	4.162e-11	CDS	coding	up-regulated	Mutant	0.9648,1.3859,0.9241,1.8276	26.0258,14.2689	1.2756	20.1473	MeRIP-seq	m6A_site_339471,m6A_site_339472,m6A_site_339473,m6A_site_339474	chr3:184299285(+),chr3:184299378(+),chr3:184299384(+),chr3:184299391(+)	RMVar_ID_151873,RMVar_ID_151877,RMVar_ID_151872,RMVar_ID_151874,RMVar_ID_1292008,RMVar_ID_1527959,RMVar_ID_795667,RMVar_ID_151875,RMVar_ID_1292009,RMVar_ID_151876
RM2Target_503189	Ana_mod_hsa_6	VIRMA	CRLF1	Homo sapiens	HeLa	29507755	GSE102493	chr19:18594064-18594599	-	12.178	3.7296e-09	1.6462e-08	CDS	coding	up-regulated	KD	0.0201,0.0206	1.2491,16.1826	0.02035	8.7158	MeRIP-seq		chr19:18594232(-),chr19:18594257(-),chr19:18594402(-)	RMVar_ID_1112971
